# Supplementary material
Source: publisher figshare collection journal article supplement (https://acs.figshare.com/articles/dataset/_/5313355)
Supplement: Supplementary file 1 [file 9109582]

## SUPPORTING INFORMATION

# Controlling Block Copolymer-Substrate Interactions by Homopolymer Brushes/Mats

*Yuanyuan Pang,<sup>†,‡</sup> Lei Wan,<sup>§</sup> Guangcheng Huang,<sup>†,‡</sup> Xiaosa Zhang,<sup>†,‡</sup> Xiaosa Jin,<sup>†,‡</sup> Peng Xu,<sup>||</sup> Yadong Liu,<sup>†</sup> Miaomiao Han,<sup>†</sup> Guang-Peng Wu<sup>⊥</sup> and Shengxiang Ji<sup>\*,†</sup>*

<sup>†</sup>Key Laboratory of Polymer Ecomaterials, Changchun Institute of Applied Chemistry, Chinese Academy of Sciences, 5625 Renmin Street, Changchun 130022, China

<sup>‡</sup>University of Chinese Academy of Sciences, Beijing, China

<sup>§</sup>HGST, A Western Digital Company, 5601 Great Oaks Parkway, San Jose, CA 95119, United States

<sup>||</sup>College of Chemistry and Chemical Engineering, Yangzhou University, Yangzhou 225009, China

<sup>⊥</sup>MOE Laboratory of Macromolecular Synthesis and Functionalization, Adsorption and Separation Materials & Technologies of Zhejiang Province, Department of Polymer Science and Engineering, Zhejiang University, Hangzhou 310027, China.

\* Address correspondence to [sji@ciac.ac.cn](mailto:sji@ciac.ac.cn)

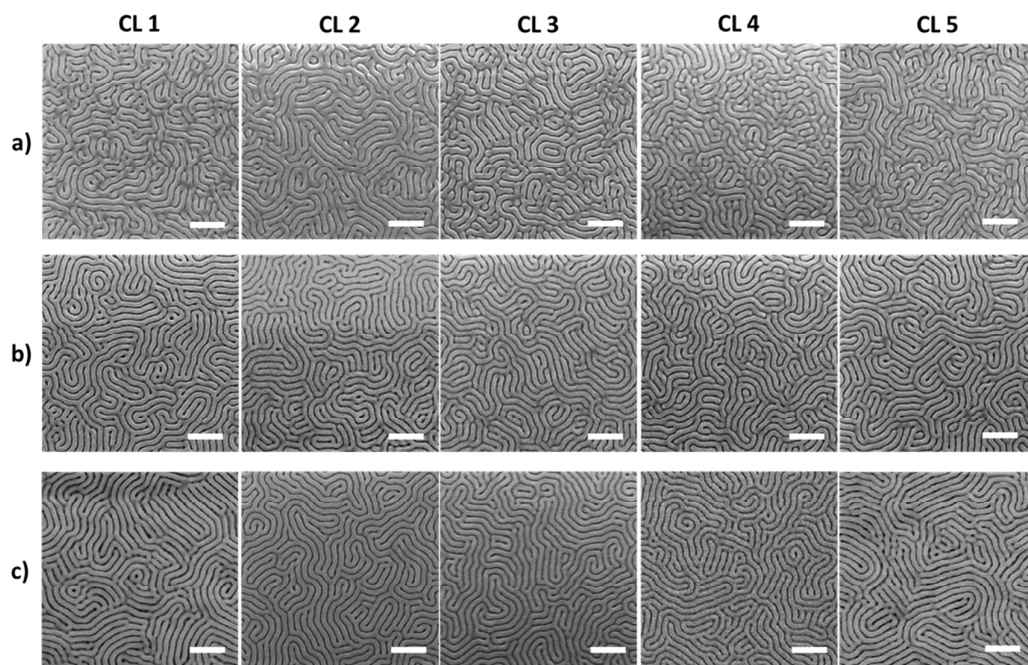

**Figure S1.** SEM images of SM5354 films on crosslinked homopolymer mats thermally annealed at a) 190 °C for 12 hours, b) 230 °C for 10 min and c) 250 °C for 5 min, respectively. Film thicknesses are ~ 50 nm. Scale bars represent 200 nm.

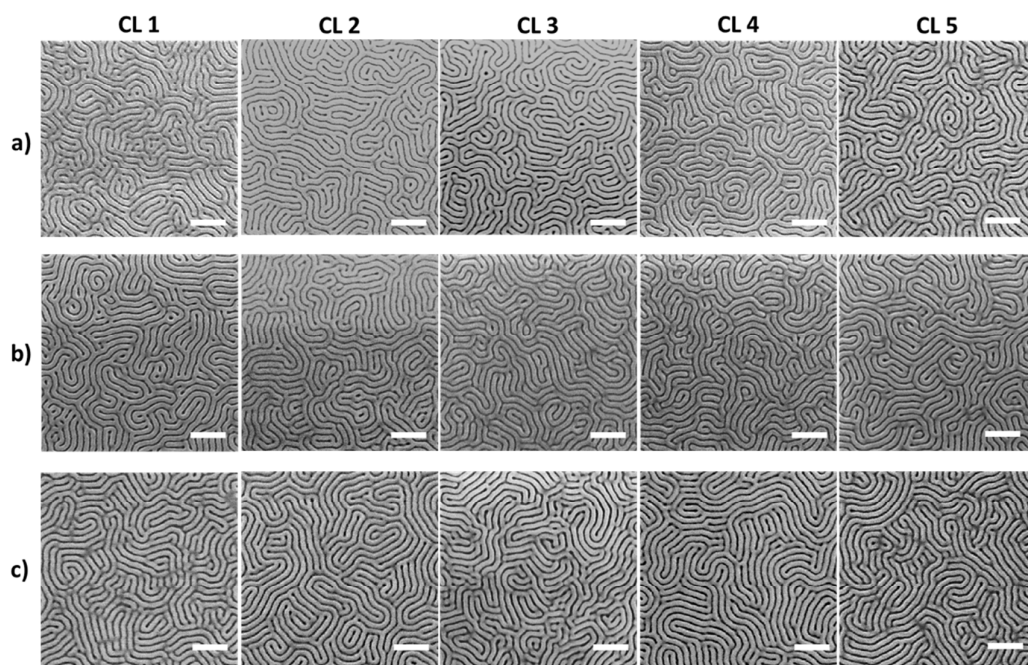

**Figure S2.** SEM images of SM5354 on crosslinked homopolymer mats thermally annealed at 230 °C under vacuum for 10 min. The film thicknesses are a) 31 nm, b) 50 nm and c) 92 nm, respectively. Scale bars represent 200 nm.

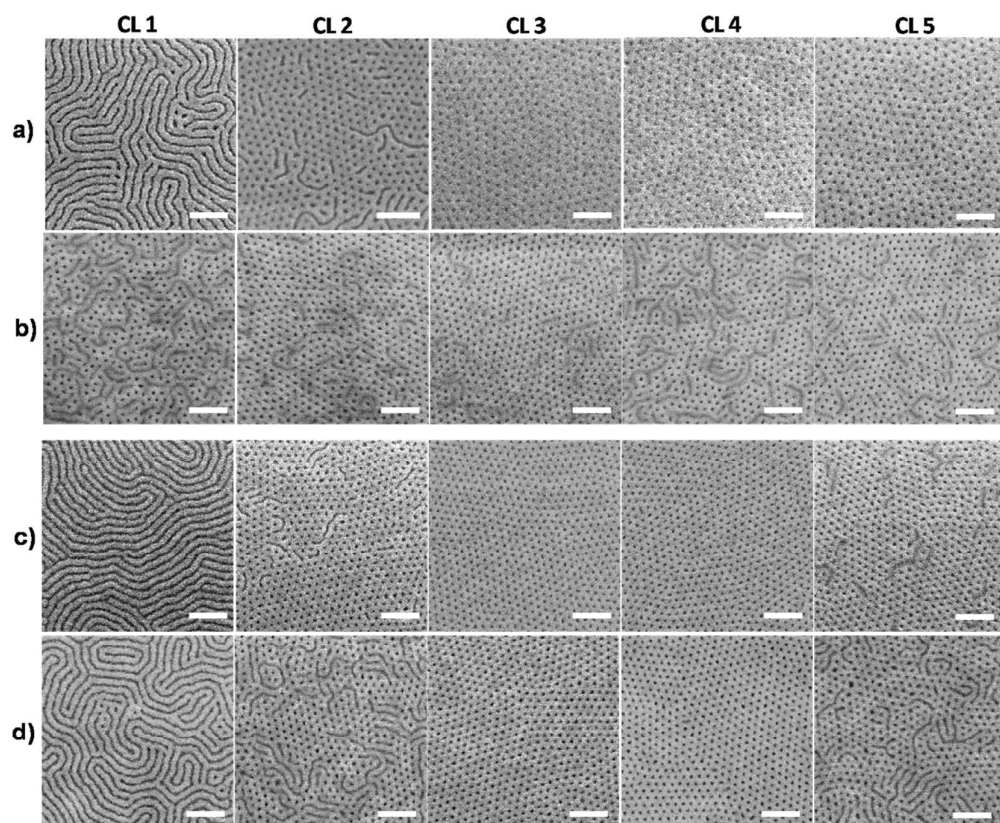

**Figure S3.** SEM images of SM4621 films on crosslinked homopolymer mats thermally annealed at a), b) 190 °C for 12 hours and c), d) 230 °C for 10 minutes. The film thicknesses are 32 nm for a), c), and 62 nm for b), d). Scale bars represent 200 nm.

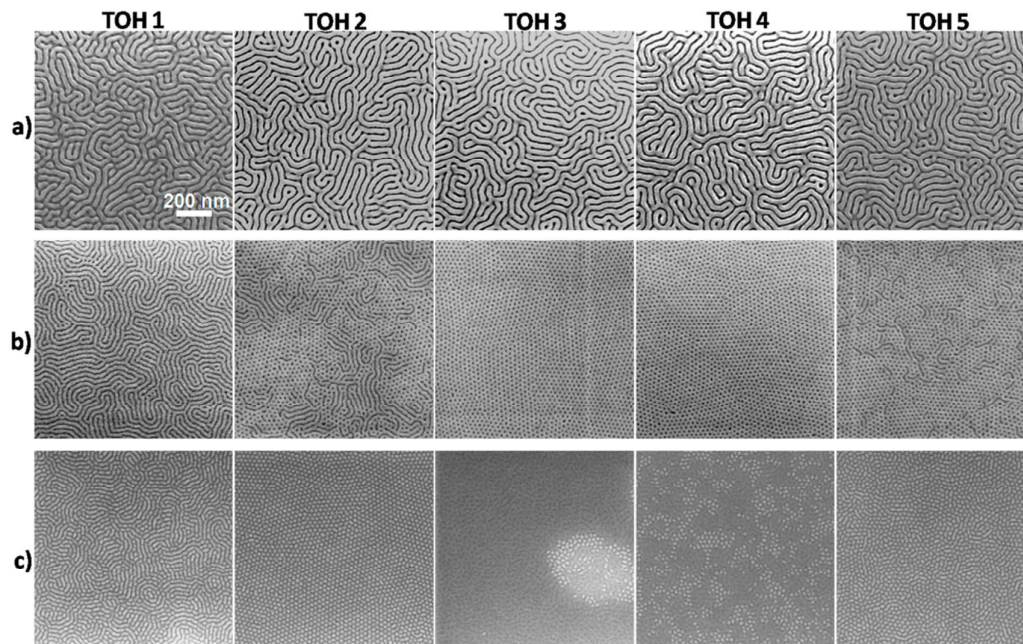

**Figure S4.** SEM images of a) SM5354, b) SM4621 and c) SM2050 on TOH1-5. The film thicknesses are a) 50 nm, b) 32 nm and c) 35 nm, respectively. The annealing temperature and time are 230 °C for 10 min for a) and b) and 250 °C for 3 min for c).

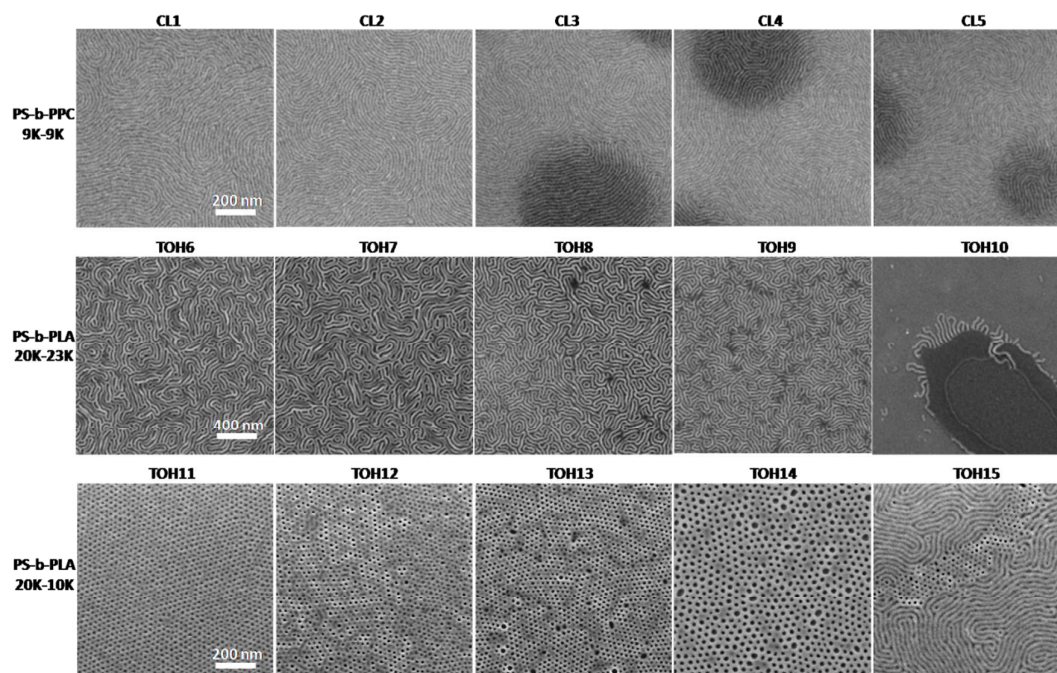

**Figure S5.** SEM images of PS-*b*-PPC and PS-*b*-PDLLA films self-assembled on homopolymer mats or brushes. PS-*b*-PPC films were annealed at 130 °C for 30 min and PS-*b*-PDLLA films were annealed at 180 °C for 12 h, respectively.

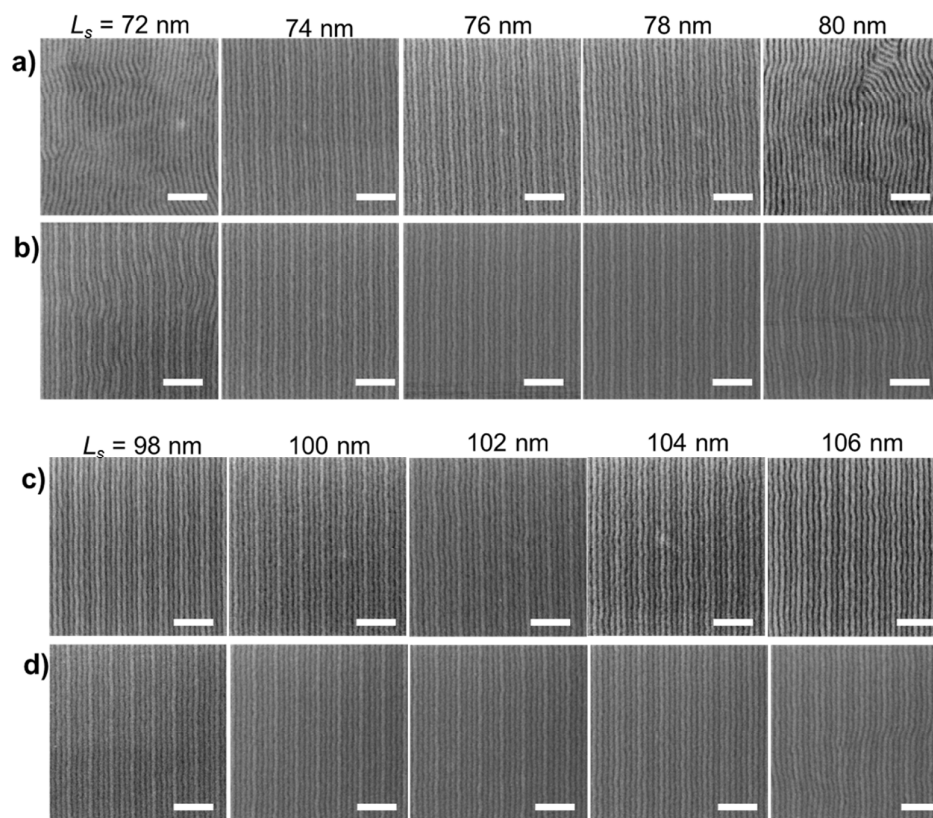

**Figure S6.** DSA of SM2222 films with 3 $\times$  and 4 $\times$  density multiplication on chemical pattern backfilled TOH1 (a, c) and TOH2 (b, d) brushes.  $L_s$  ranged from 72 to 80 nm for 3 $\times$  and 98 to 106 nm for 4 $\times$  density multiplication. Scale bars represent 200 nm.

**Table S1.** The brush/mat thicknesses, water contact angles and SEM images of self-assembled SM5354 films as a function of heating time for brush/mat formation.

| CL2                     |      |      |      |      |      |      |      |      |
|-------------------------|------|------|------|------|------|------|------|------|
| Heating time (min)      | 15   | 30   | 60   | 120  | 240  | 480  | 960  | 1440 |
| Mat thickness (nm)      | 5.8  | 5.4  | 6.1  | 5.7  | 6.2  | 5.5  | 5.8  | 5.9  |
| Contact angle (°)       | 84.0 | 83.9 | 83.9 | 83.9 | 83.4 | 83.9 | 83.2 | 84.1 |
| Self-assembly of SM5354 |      |      |      |      |      |      |      |      |
| TOH2                    |      |      |      |      |      |      |      |      |
| Heating time (min)      | 15   | 30   | 60   | 120  | 240  | 480  | 960  | 1440 |
| Brush thickness (nm)    | 1.2  | 1.9  | 2.8  | 2.9  | 3.2  | 3.5  | 4.9  | 5.2  |
| Contact angle (°)       | 60.8 | 68.7 | 72.5 | 76.5 | 78.2 | 78.8 | 82.7 | 83.5 |
| Self-assembly of SM5354 |      |      |      |      |      |      |      |      |

**Table S2.** Wetting behaviors of PS-*b*-PMMA films self-assembled on TOH1-15 brushes and CL1-5 mats <sup>a</sup>.

|        | TOH1 | TOH2 | TOH3 | TOH4 | TOH5  | CL1   | CL2   | CL3   | CL4   | CL5   |
|--------|------|------|------|------|-------|-------|-------|-------|-------|-------|
| SM5354 | ⊙    | ●    | ●    | ●    | ⊙     | ⊙     | ●     | ●     | ●     | ⊙     |
| SM4621 | ○    | ⊙    | ●    | ●    | ⊙     | ○     | ⊙     | ●     | ●     | ⊙     |
| SM2050 | ⊙    | ●    | ○    | ○    | ⊙     | ⊙     | ●     | ○     | ○     | ⊙     |
|        | TOH6 | TOH7 | TOH8 | TOH9 | TOH10 | TOH11 | TOH12 | TOH13 | TOH14 | TOH15 |
| SM5354 | ⊙    | ●    | ●    | ●    | ⊙     | ○     | ○     | ⊙     | ●     | ●     |
| SM4621 | ⊙    | ○    | ⊙    | ○    | ⊙     | ○     | ○     | ○     | ●     | ○     |
| SM2050 | ○    | ⊙    | ○    | ⊙    | ○     | ○     | ○     | ⊙     | ⊙     | ○     |

<sup>a</sup> “●” represents non-preferential (or neutral), “○” represents preferential, and “⊙” represents nearly non-preferential wetting behaviors.
